# Supplementary material for: A wearable paper-integrated microfluidic device for sequential analysis of sweat based on capillary action
Source: Royal Society of Chemistry journal article supplement (doi:10.1039/d2sd00032f), 2022-01-01
Supplement: d2sd00032f3.pdf [file d2sd00032f3.pdf]

## **A Wearable Paper-Integrated Microfluidic Device for Sequential Analysis of Sweat Based on Capillary Action**

Taher Abbasiasl,<sup>a</sup> Fariborz Mirlou,<sup>b</sup> Emin Istif,<sup>a</sup> Hatice Ceylan Koydemir,<sup>c</sup> and Levent Beker<sup>\*a</sup>

<sup>a</sup> Department of Mechanical Engineering, Koç University, Rumelifeneri Yolu, Sarıyer, Istanbul 34450, Turkey

<sup>b</sup> Department of Electrical and Electronics Engineering, Koç University, Rumelifeneri Yolu, Sarıyer, Istanbul 34450, Turkey

<sup>c</sup> Department of Biomedical Engineering, Texas A&M University, College Station, TX 77843, USA

\* Email: lbeker@ku.edu.tr

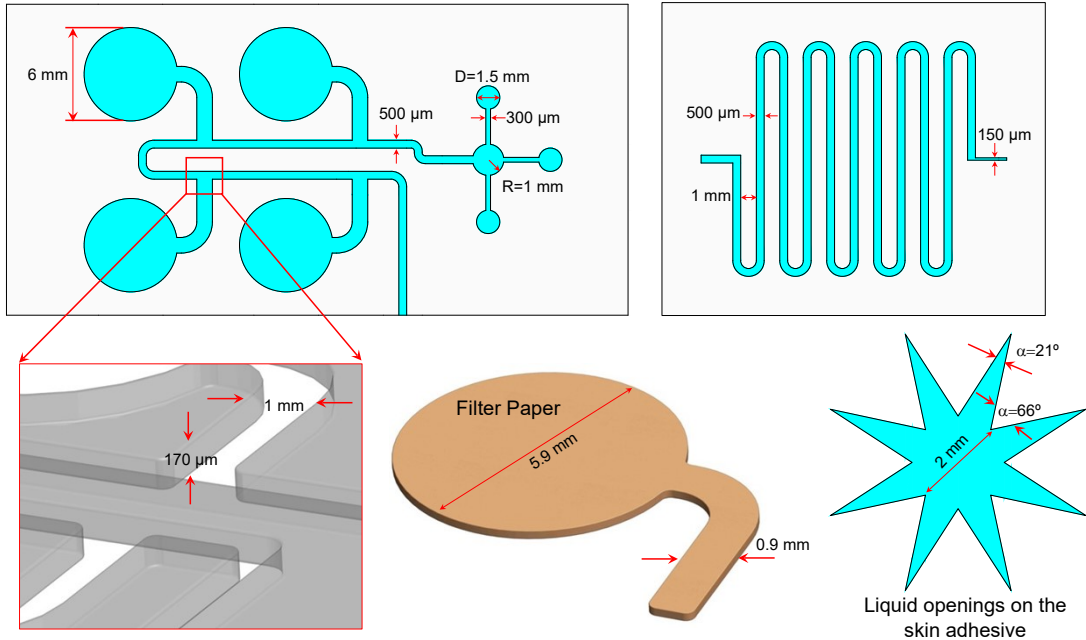

**Fig. S1.** Geometric information and dimensions for the microfluidic layer.

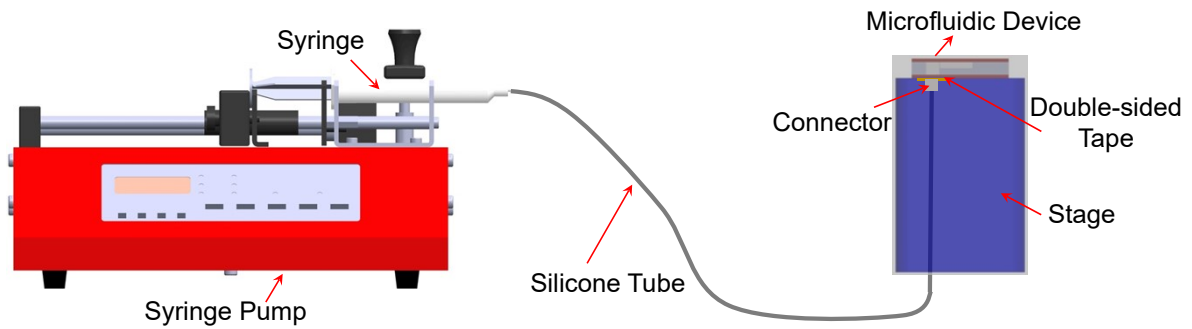

**Fig. S2.** Demonstration of the artificial sweat generation system.

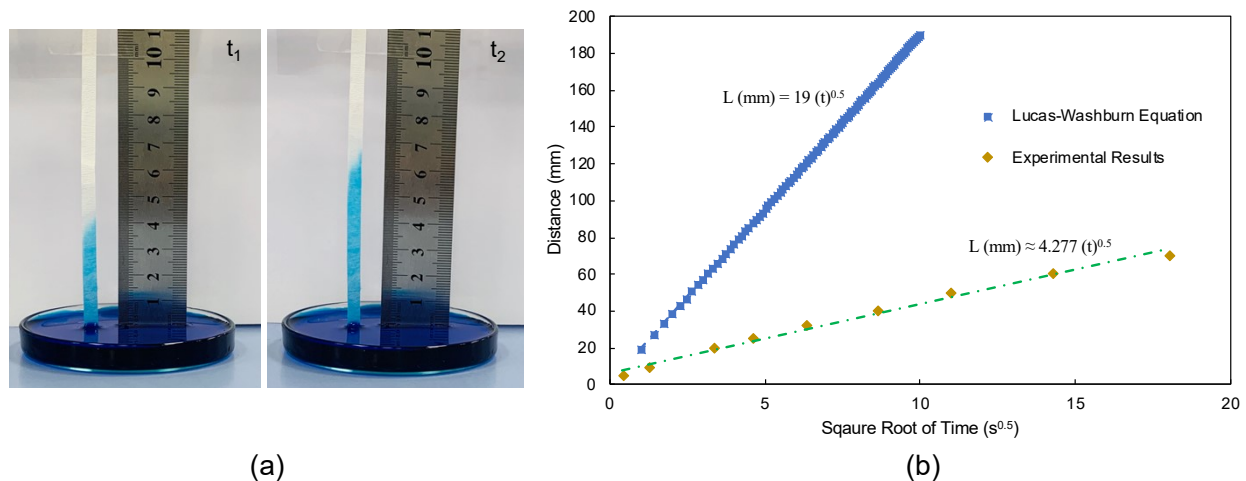

**Fig. S3.** (a) A strip of filter paper placed vertically with tip dipped in dyed water, (b) The distance traveled by the fluid ( $L$ ) as a function of the square root of time ( $t$ ).

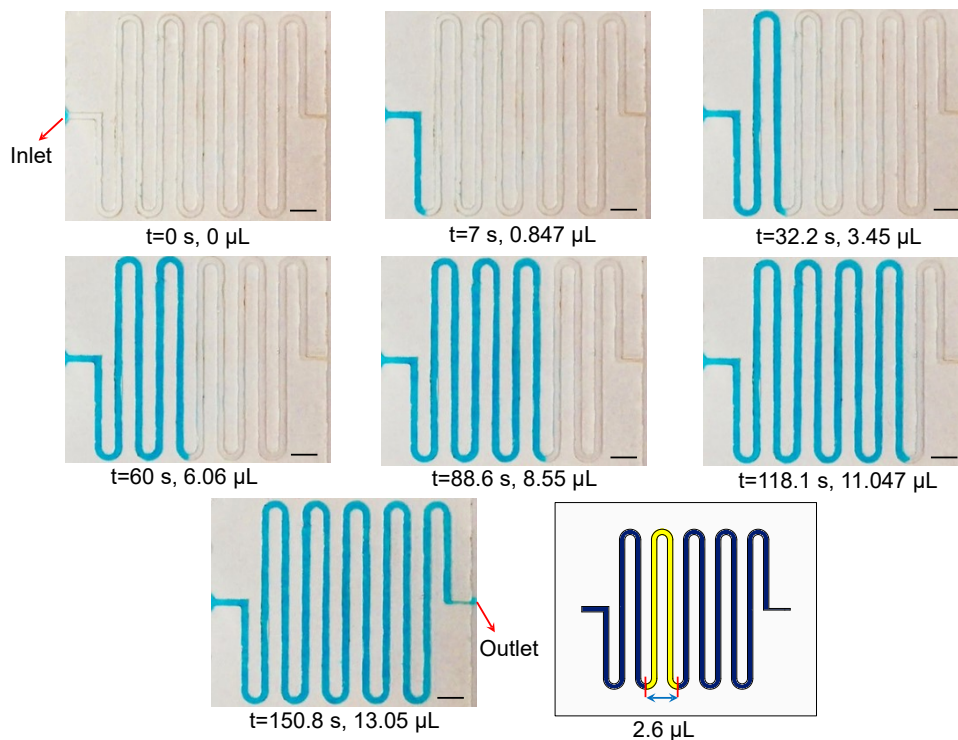

**Fig. S4.** Demonstration of sweat rate measurement at liquid flow rate of  $5 \mu\text{L}/\text{min}$ , based on optical images of the device at different time frames. Scale bars are 2 mm.

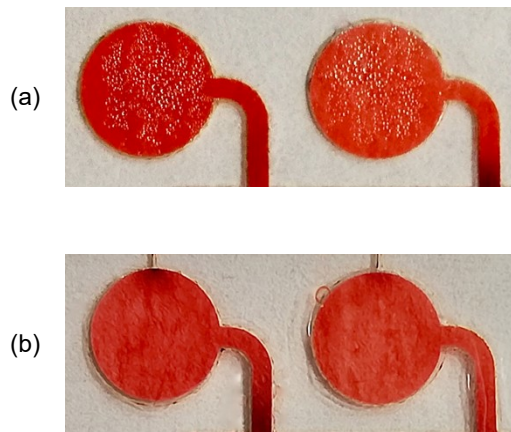

**Fig. S5.** Images of the microfluidic device after 48 hours at 37 °C. (a) Without and (b) With air outlet.

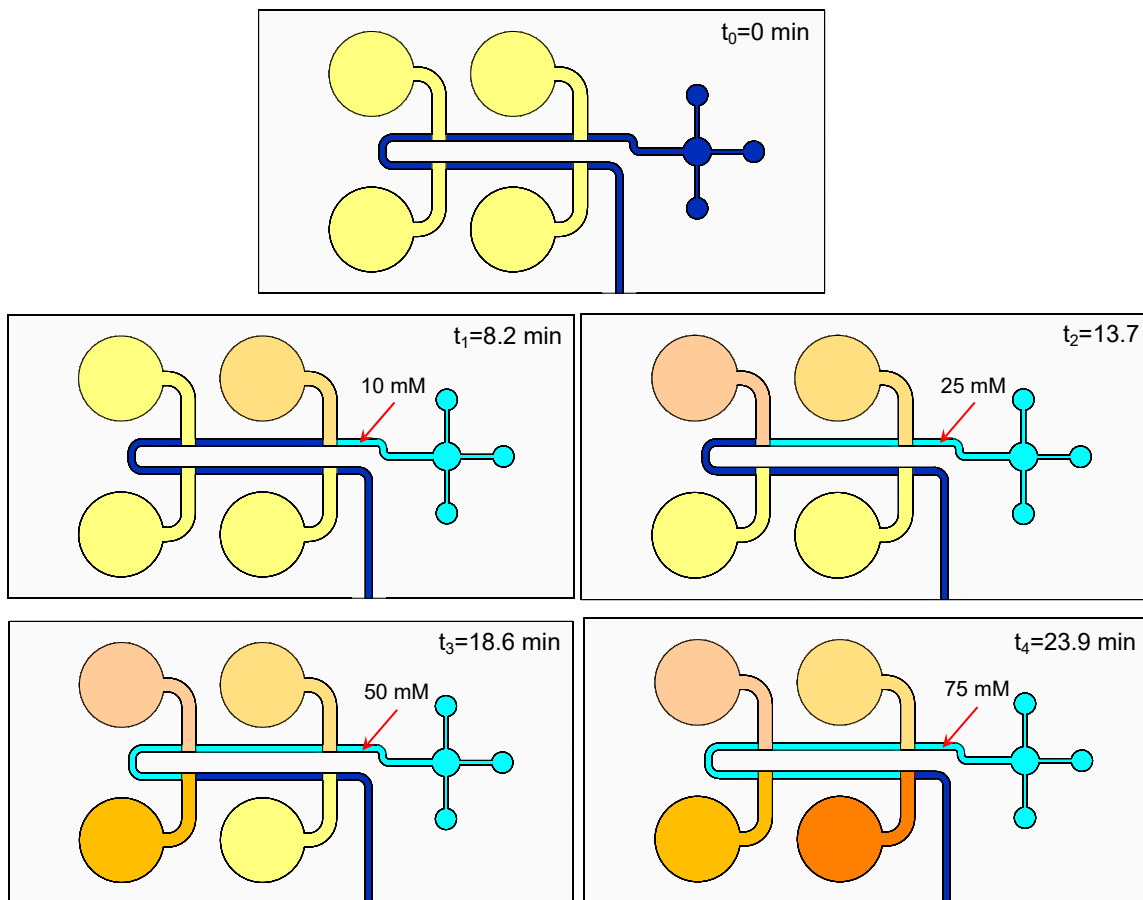

**Fig. S6.** Representative images showing sequential pumping of glucose solutions with different concentrations.  $t_1$ - $t_4$  could be different depending on the reservoir number, because reservoirs do not have the same filling times.

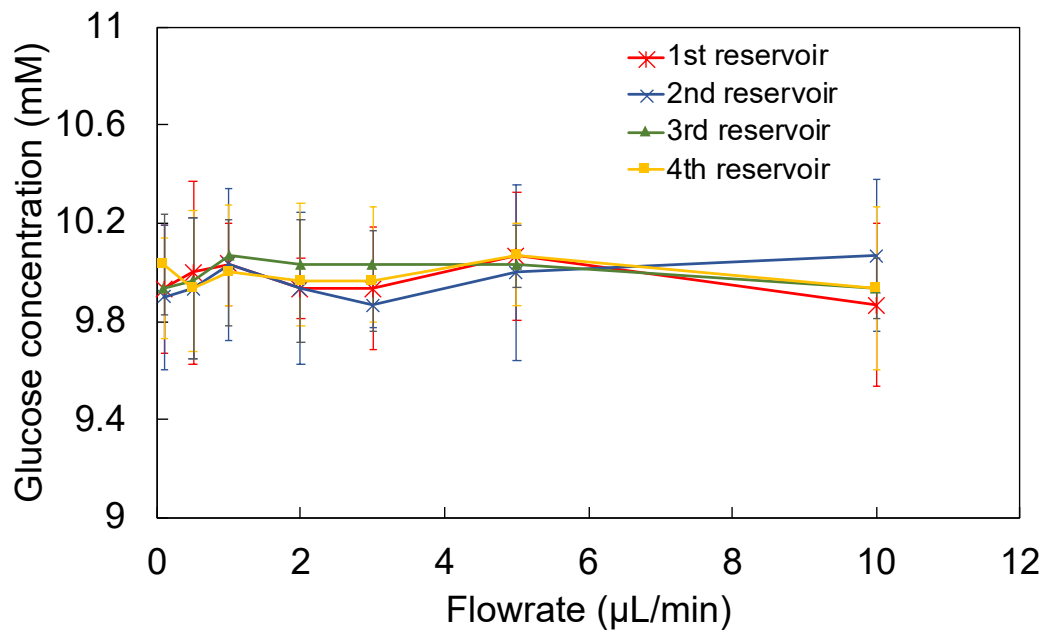

**Fig. S7.** effect of liquid flowrate on the colorimetric analysis. Glucose solutions of 10 mM were pumped into the microfluidic device using the artificial perspiration setup at various flow rates.
